# Supplementary material
Source: PubMed Central journal article supplement (PMC3805459)

## Figure S1

A

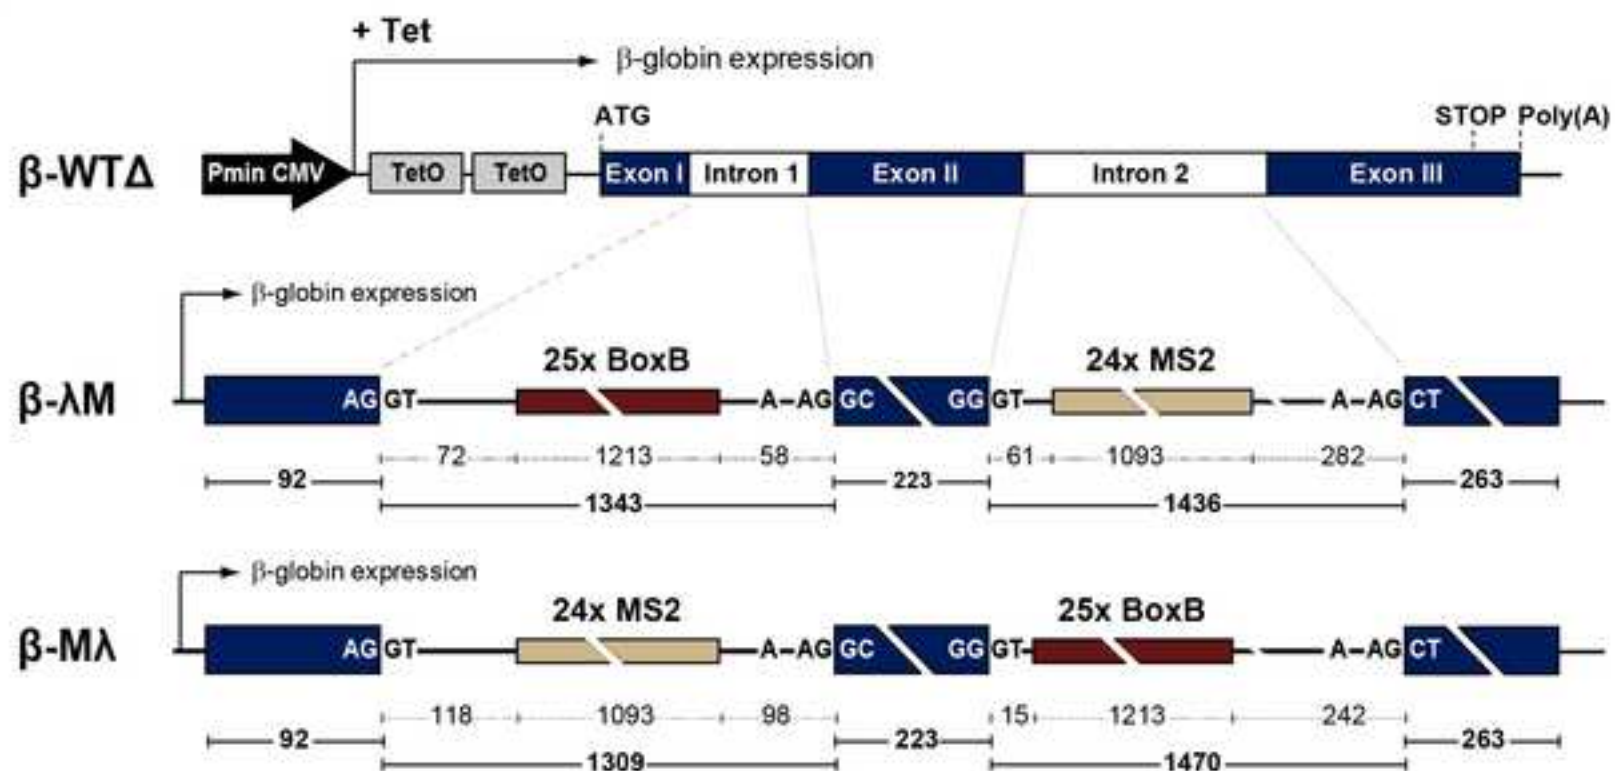

B

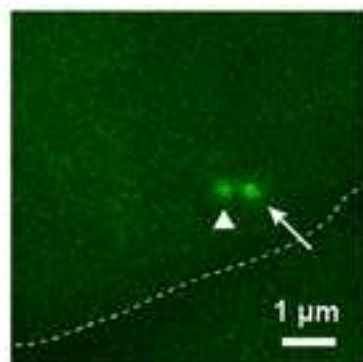

C

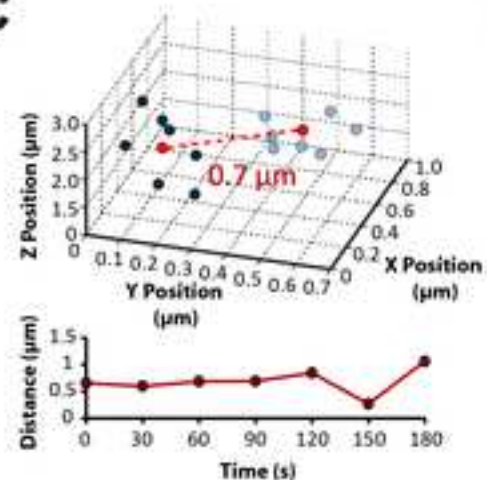

D

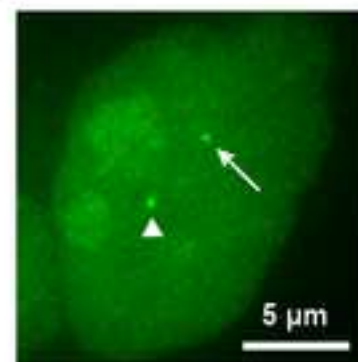

E

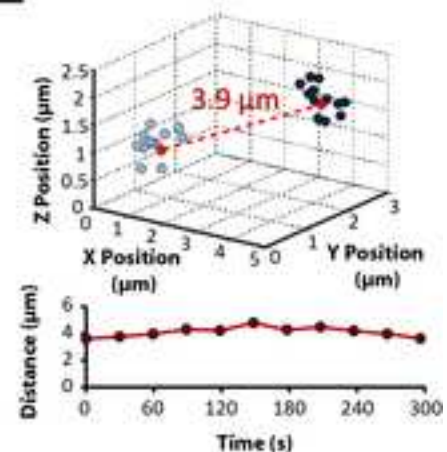

# Figure S2

MS2 repeats

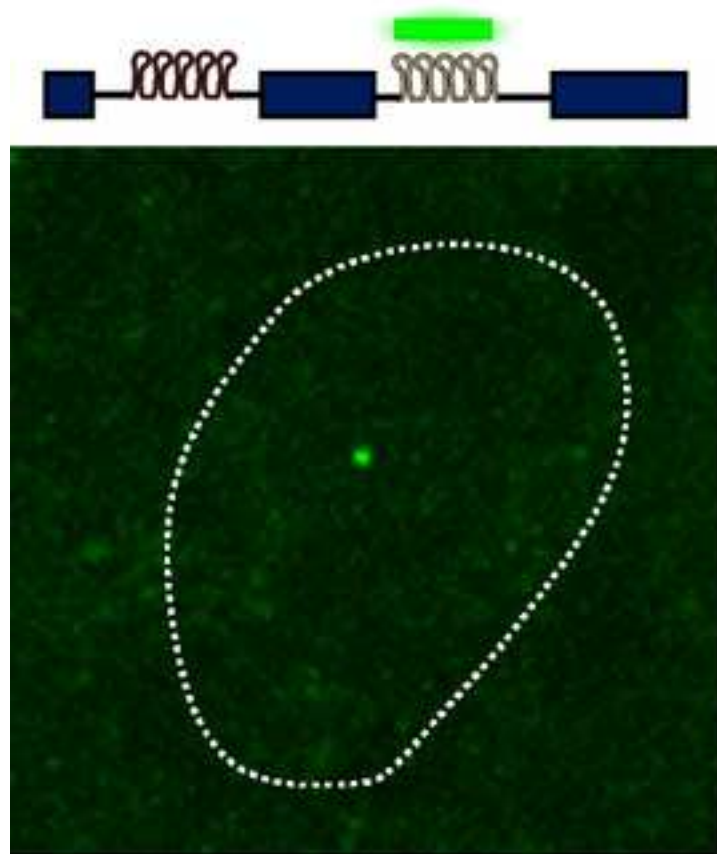

pre-mRNA

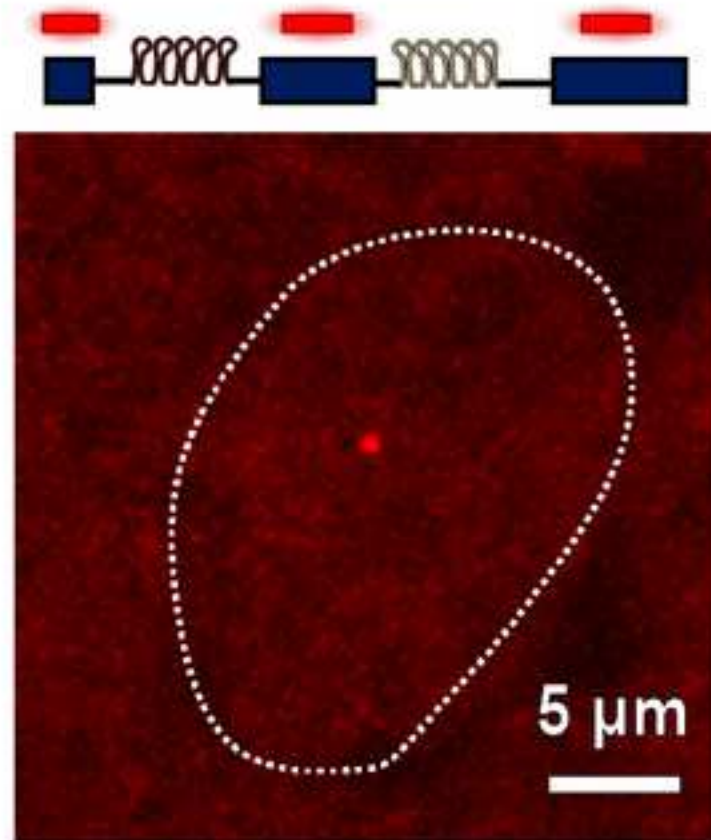

Merge

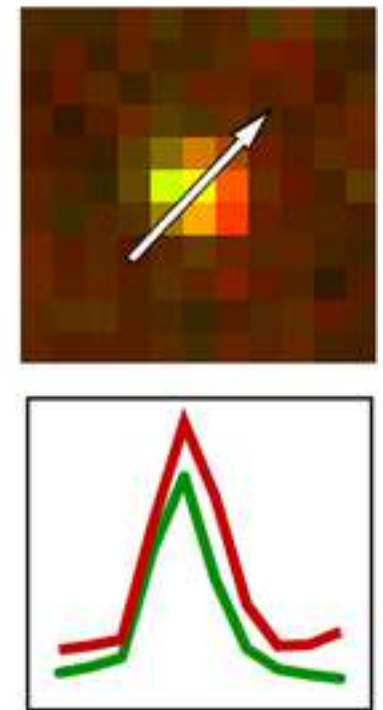





## Figure S4

A

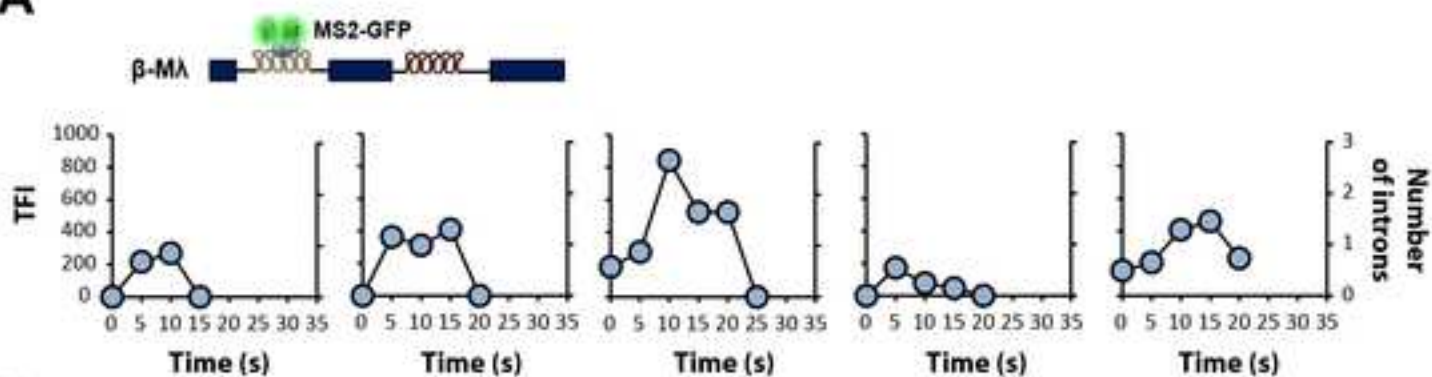

B

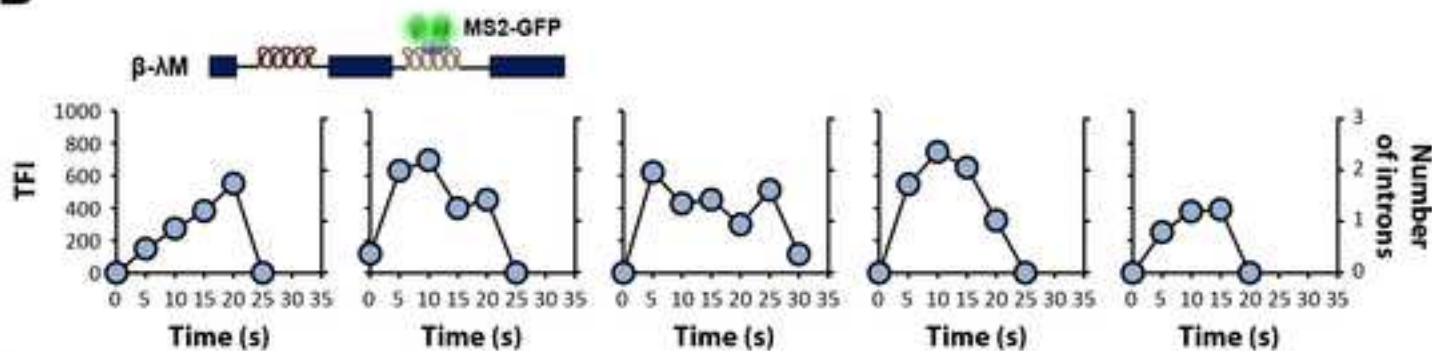

C

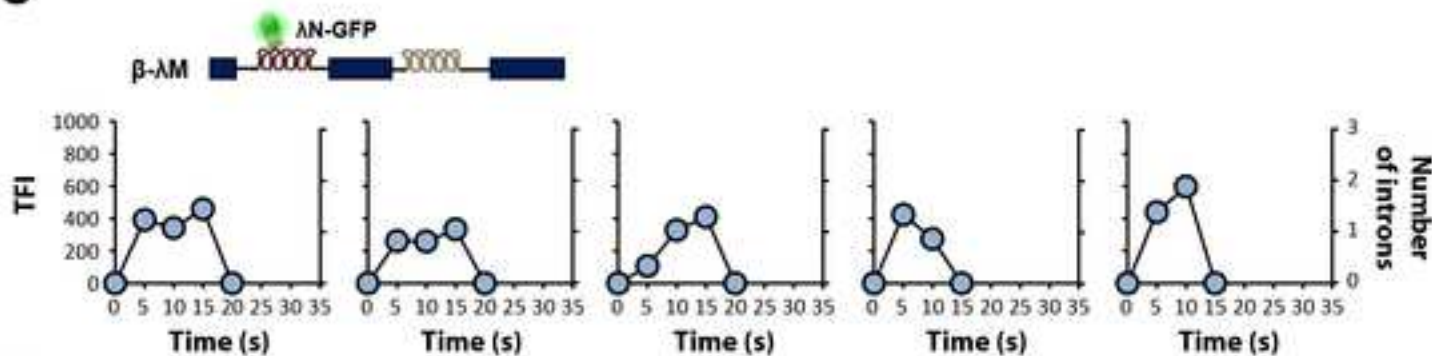

D

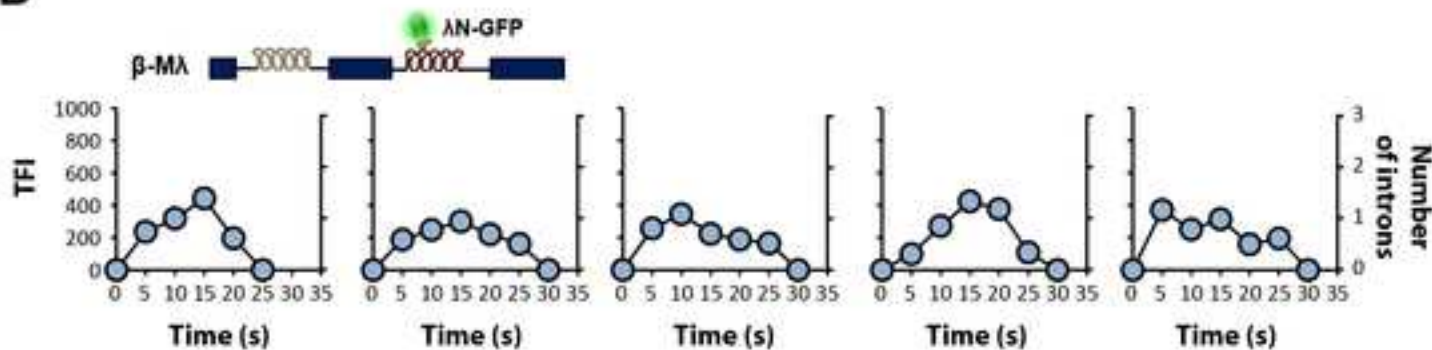

## Figure S5

A

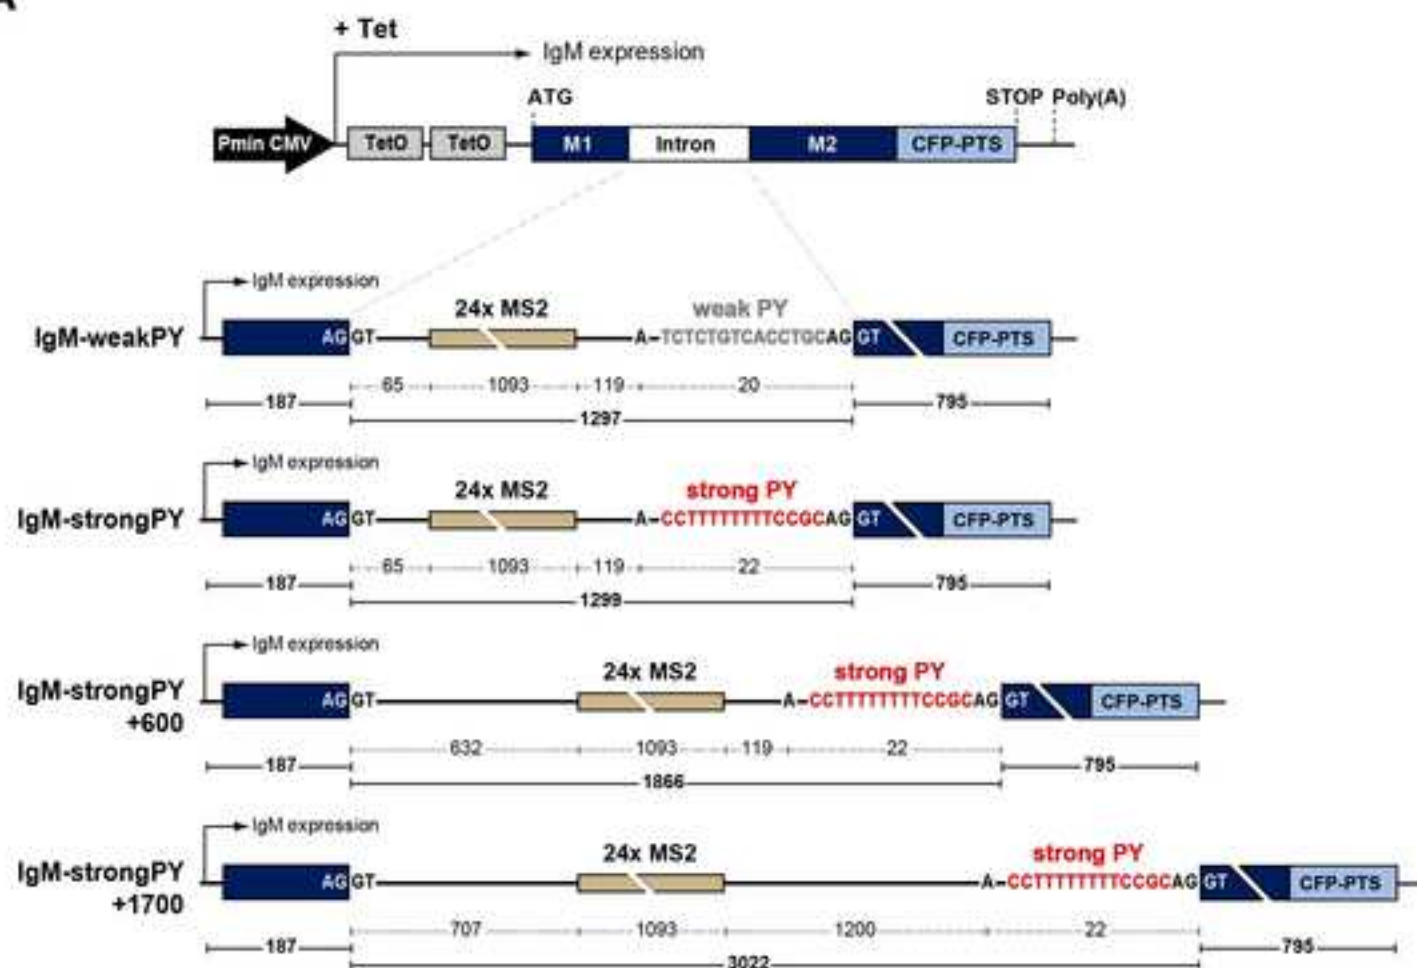

B

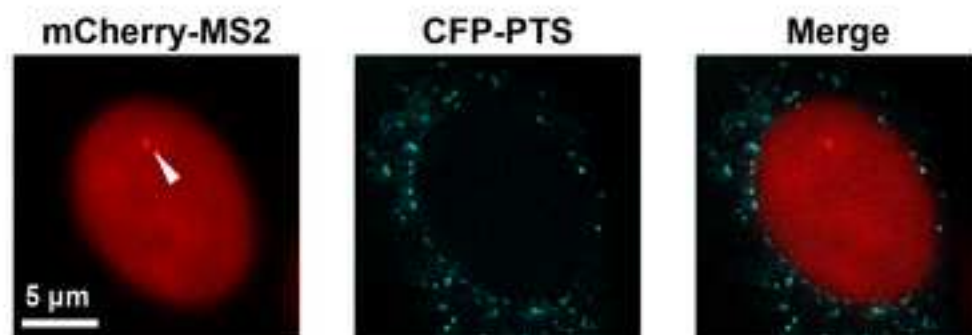

## Figure S6

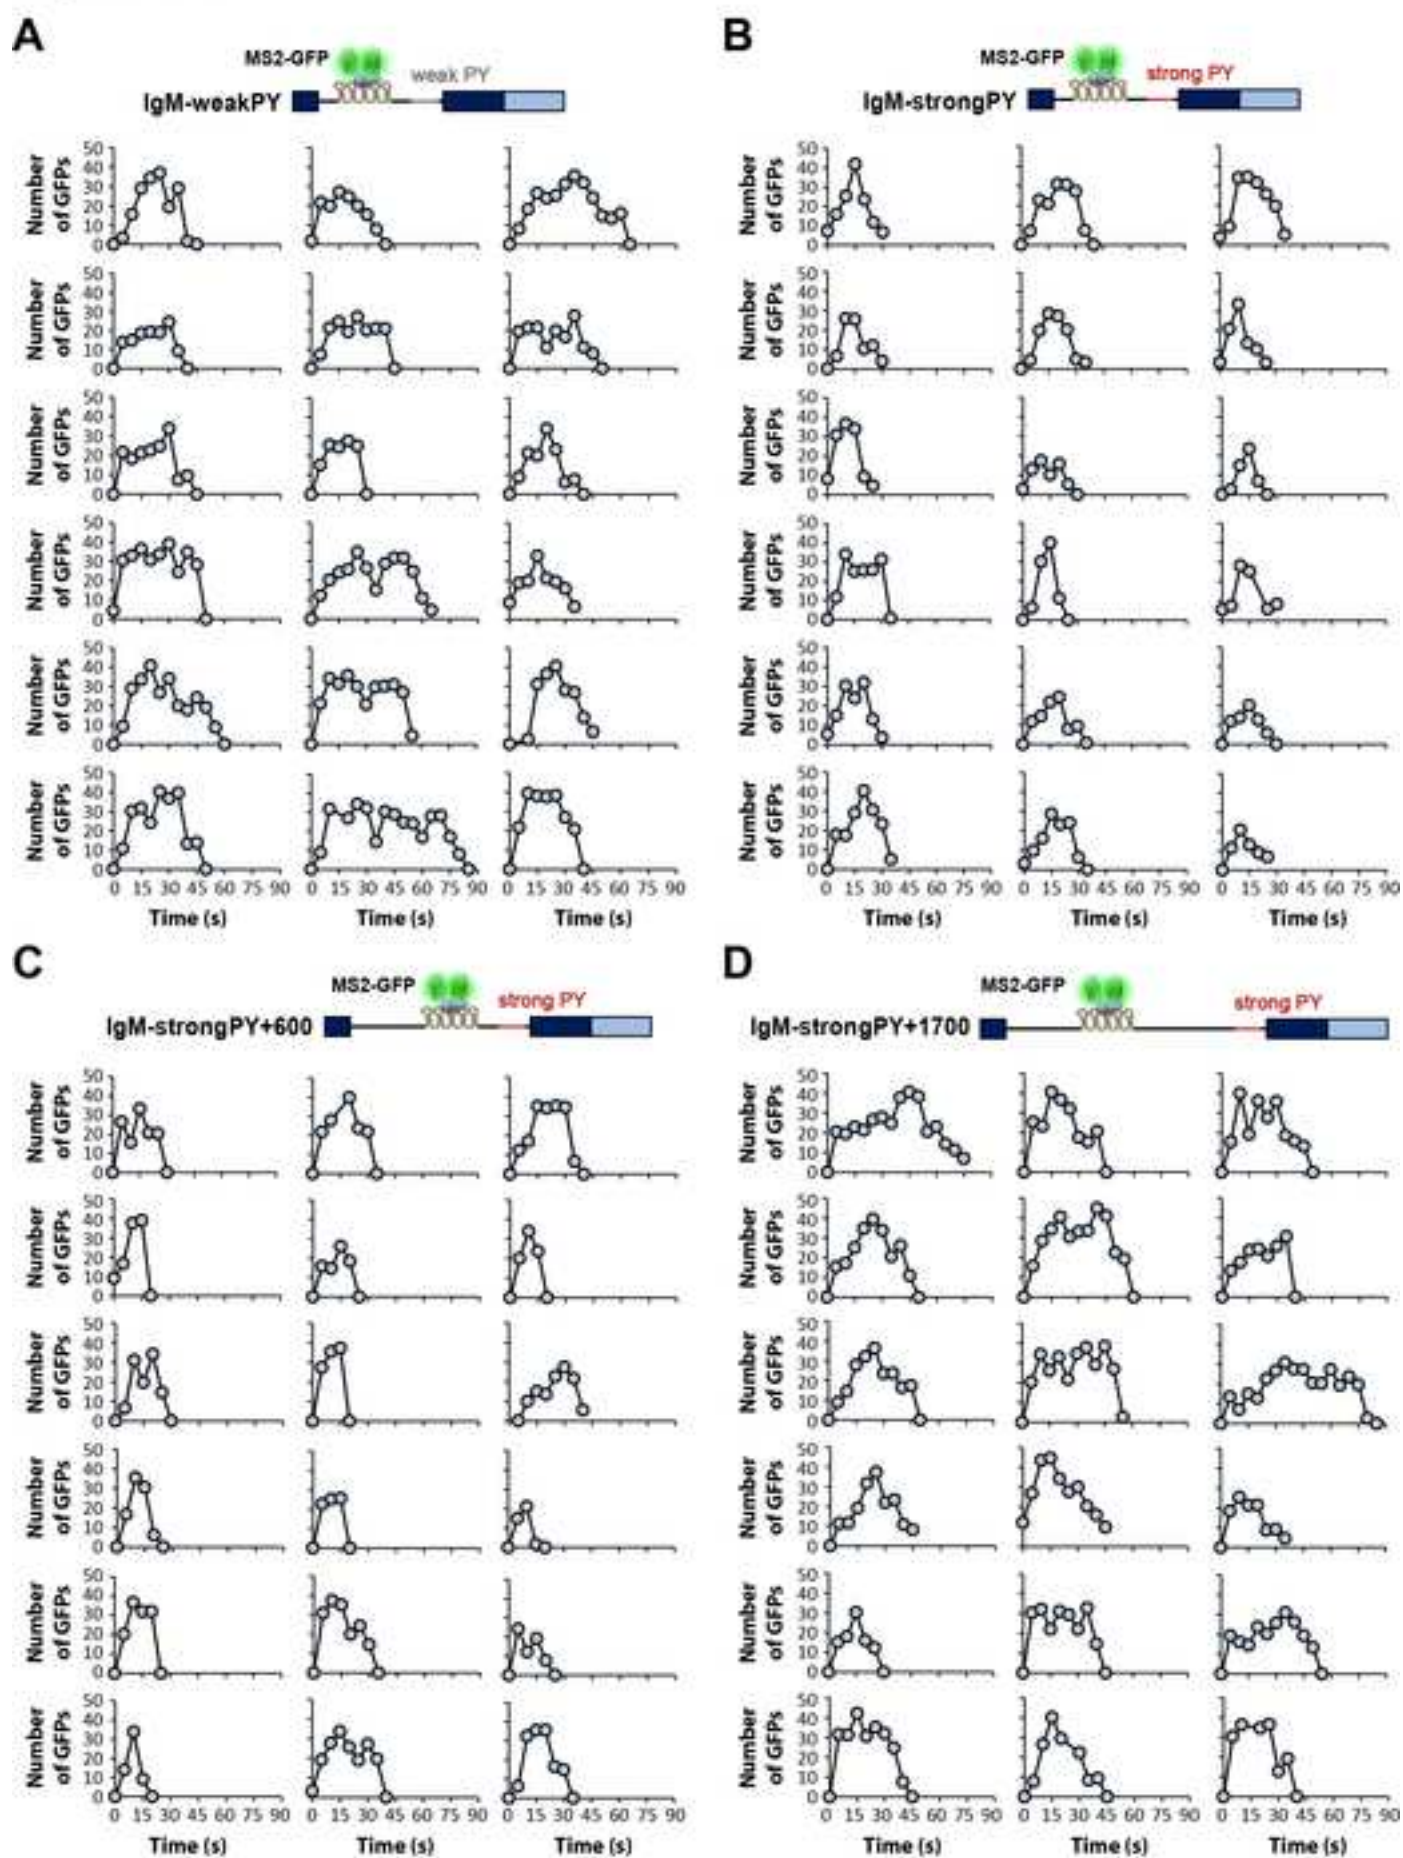

Supplement: NIHMS518362-supplement-04.pdf [file NIHMS518362-supplement-04.pdf]
